# Supplementary material for: A comprehensive health effects assessment of the use of sanitizers and disinfectants during COVID-19 pandemic: a global survey
Source: Springer Nature journal article supplement (doi:10.1007/s11356-023-27197-6), 2023-05-11
Supplement: MOESM1 [file 11356_2023_27197_MOESM1_ESM.pdf]

## COVID-19 Disease Questionnaire

This questionnaire was prepared to evaluate the health effects of the use of Sanitizers and Disinfectants during the pandemic of COVID-19 disease under the supervision of Shiraz University of Medical Sciences, Iran. The present questionnaire is designed in such a way that the results will not be obvious to anyone but the implementers of the project. Thank you in advance for spending time completing this questionnaire. (Please answer the questions honestly).

Informed consent: "I have read the above information and understood the purpose of this study. I understand that my participation is voluntary, and there will be no risk, benefit, or compensation for me and regard confidentiality".

**I will answer this questionnaire with informed consent.**

### **Part One: General Information**

- **Age:** Under 20 or less      21 to 30      31 to 40      41 to 50      51 to 60      60 and over

- **Sex:** Male      Female

#### **- education:**

Primary/secondary education

Associate Degree

Bachelor

Masters

Ph.D and postdoctoral

#### **-Job:**

Unemployed/housekeeper/student

University Student

Government employee

Private office employee

Freelance (self-employed)

- **Country:** .....

**-Location:** Rural city

**-Income:**

Low

lower-middle

middle

upper-middle

high-income

## **Part 2: Consumption of sanitizers and disinfectants**

**What sanitizers have you used in the past year since the onset of the Covid-19 pandemic? (You can choose more than one option)**

Soap and toilet liquid

Alcohol or non-commercial alcohol-based sanitizers

Hospital-grade sanitizers (savlon; antiseptic liquid)

Other commercial sanitizers (chlorhexidine gluconate, bronopol, triclosan)

Sodium hypochlorite (bleach)

I have not used any substance for hand washing

**The number of daily uses of hand sanitizer:**

Once a day

1-3 times a day

4 to 6 times a day

More than 6 times a day

None

**The consumption volume of sanitizer solutions per month:**

Low (less than 100cc)

Medium (101 to 300cc)

High (301 to 500cc)

Too much (more than 500cc)

None

**What disinfectants have you used to disinfect different levels over the past year since the onset of the COVID-19 pandemic? (You can choose more than one option)**

Sodium hypochlorite (bleach)

Perchlorate

Alcohol-based materials

Detergents (Soap and toilet liquid, dishwashing liquid)

Hydrogen peroxide

Formaldehyde

Hospital disinfectants (quaternary ammonium, tetra-acetyl ethylenediamine)

I have not used any substance to disinfect the surfaces

**- The number of daily use of disinfectants to disinfect surfaces:**

Once a day

1-3 times a day

4 to 6 times a day

More than 6 times a day

None

**- The volume of disinfection consumption per month:**

Low (less than 0.5 liters)

Medium (0.5 to 1 liter)

High (1.1 to 2 liters)

Too much (more than 2 liters)

None

### **Section 3: Health Complications of Using Sanitizers and Disinfectants:**

**If you have used hand sanitizers and disinfectants to wash different surfaces during the past year since the onset of the COVID-19 pandemic, please answer the following questions.**

**Does your skin itch and burn after each use of disinfectants and sanitizers?**

Yes              No              Sometimes

**Do your hands become scaly after each use of disinfectants and sanitizers?**

Yes              No              Sometimes

**Do your hands become dry after each use of disinfectants and sanitizers?**

Yes              No              Sometimes

**Does your skin get hives after each use of disinfectants and sanitizers?**

Yes              No              Sometimes

**Do your eyes get irritated and itchy after each use of disinfectants and sanitizers?**

Yes              No              Sometimes

**Do your eyes turn red after each use of disinfectants and sanitizers?**

Yes              No              Sometimes

**Does your nose get irritated and itchy after each use of disinfectants and sanitizers?**

Yes              No              Sometimes

**Does your nose run out after each use of disinfectants and sanitizers?**

Yes              No              Sometimes

**Does your throat become itchy and itchy every time you use disinfectants and sanitizers?**

Yes              No              Sometimes

**Do you cough and sneeze after each use of disinfectants and sanitizers?**

Yes              No              Sometimes

**Do you get headaches and dizziness after each use of disinfectants and sanitizers?**

Yes              No              Sometimes

**Do you feel nauseous after each use of disinfectants and sanitizers?**

Yes              No              Sometimes

**Did you go to a medical center during the last year due to the above complications?**

Yes              No

**Thank you very much for your cooperation in this research. Please click on the "submit button" to register for the questionnaire.**
